# Supplementary material for: Routes to diagnosis of symptomatic cancer in sub-Saharan Africa: systematic review
Source: PubMed Central journal article supplement (PMC7678384; doi:10.1136/bmjopen-2020-038605), 2020-11-19
Supplement: bmjopen-2020-038605supp002.pdf [file bmjopen-2020-038605supp002.pdf]

***Additional file 2: Ovid MEDLINE(R), PsycINFO, Embase, Global Health***

| <b>Set</b> | <b>Search Statement</b>                                                                                                                                                                                                  |
|------------|--------------------------------------------------------------------------------------------------------------------------------------------------------------------------------------------------------------------------|
| 1.         | Angola*.ti,ab.                                                                                                                                                                                                           |
| 2.         | Gabon*.ti,ab.                                                                                                                                                                                                            |
| 3.         | Nigeria*.ti,ab.                                                                                                                                                                                                          |
| 4.         | Benin*.ti,ab.                                                                                                                                                                                                            |
| 5.         | Gambia*.ti,ab.                                                                                                                                                                                                           |
| 6.         | Rwanda*.ti,ab.                                                                                                                                                                                                           |
| 7.         | Botswana*.ti,ab.                                                                                                                                                                                                         |
| 8.         | Ghana*.ti,ab.                                                                                                                                                                                                            |
| 9.         | Sao Tome*.ti,ab.                                                                                                                                                                                                         |
| 10.        | Sao Tome.mp. and Principe*.ti,ab. [mp=title, abstract, heading word, drug trade name, original title, device manufacturer, drug manufacturer, device trade name, keyword, floating subheading word, candidate term word] |
| 11.        | Burkina Faso*.ti,ab.                                                                                                                                                                                                     |
| 12.        | Guinea-Bissau*.ti,ab.                                                                                                                                                                                                    |
| 13.        | Seychelles*.ti,ab.                                                                                                                                                                                                       |
| 14.        | Guinea*.ti,ab.                                                                                                                                                                                                           |
| 15.        | Senegal*.ti,ab.                                                                                                                                                                                                          |
| 16.        | Burundi*.ti,ab.                                                                                                                                                                                                          |
| 17.        | Cabo Verde*.ti,ab.                                                                                                                                                                                                       |
| 18.        | Kenya*.ti,ab.                                                                                                                                                                                                            |
| 19.        | Sierra Leone*.ti,ab.                                                                                                                                                                                                     |
| 20.        | Cameroon*.ti,ab.                                                                                                                                                                                                         |
| 21.        | Lesotho*.ti,ab.                                                                                                                                                                                                          |
| 22.        | Somalia*.ti,ab.                                                                                                                                                                                                          |
| 23.        | Central African Republic*.ti,ab.                                                                                                                                                                                         |
| 24.        | Liberia*.ti,ab.                                                                                                                                                                                                          |
| 25.        | South Africa*.ti,ab.                                                                                                                                                                                                     |
| 26.        | Chad*.ti,ab.                                                                                                                                                                                                             |
| 27.        | Madagascar*.ti,ab.                                                                                                                                                                                                       |
| 28.        | South Sudan*.ti,ab.                                                                                                                                                                                                      |
| 29.        | Comoros*.ti,ab.                                                                                                                                                                                                          |
| 30.        | Malawi*.ti,ab.                                                                                                                                                                                                           |
| 31.        | Sudan*.ti,ab.                                                                                                                                                                                                            |
| 32.        | Congo*.ti,ab.                                                                                                                                                                                                            |
| 33.        | Mali*.ti,ab.                                                                                                                                                                                                             |
| 34.        | Swaziland*.ti,ab.                                                                                                                                                                                                        |
| 35.        | Mauritania*.ti,ab.                                                                                                                                                                                                       |
| 36.        | Tanzania*.ti,ab.                                                                                                                                                                                                         |
| 37.        | Cote d'Ivoire*.ti,ab.                                                                                                                                                                                                    |
| 38.        | Mauritius*.ti,ab.                                                                                                                                                                                                        |
| 39.        | togo*.ti,ab.                                                                                                                                                                                                             |
| 40.        | Equatorial Guinea*.ti,ab.                                                                                                                                                                                                |
| 41.        | Mozambique*.ti,ab.                                                                                                                                                                                                       |
| 42.        | Uganda*.ti,ab.                                                                                                                                                                                                           |
| 43.        | Eritrea*.ti,ab.                                                                                                                                                                                                          |
| 44.        | Namibia*.ti,ab.                                                                                                                                                                                                          |
| 45.        | Zambia*.ti,ab.                                                                                                                                                                                                           |
| 46.        | Ethiopia*.ti,ab.                                                                                                                                                                                                         |
| 47.        | Niger*.ti,ab.                                                                                                                                                                                                            |
| 48.        | Zimbabwe*.ti,ab.                                                                                                                                                                                                         |
| 49.        | Africa*.ti,ab.                                                                                                                                                                                                           |

|     |                                                                                                                                                                                                                                                                                                 |
|-----|-------------------------------------------------------------------------------------------------------------------------------------------------------------------------------------------------------------------------------------------------------------------------------------------------|
| 50. | Sub-Sahara*.ti,ab.                                                                                                                                                                                                                                                                              |
| 51. | 1 or 2 or 3 or 4 or 5 or 6 or 7 or 8 or 9 or 10 or 11 or 12 or 13 or 14 or 15 or 16 or 17 or 18 or 19 or 20 or 21 or 22 or 23 or 24 or 25 or 26 or 27 or 28 or 29 or 30 or 31 or 32 or 33 or 34 or 35 or 36 or 37 or 38 or 39 or 40 or 41 or 42 or 43 or 44 or 45 or 46 or 47 or 48 or 49 or 50 |
| 52. | cancer*.ti,ab.                                                                                                                                                                                                                                                                                  |
| 53. | exp Neoplasms/                                                                                                                                                                                                                                                                                  |
| 54. | (adenocarcinoma or astrocytoma or glioma or Hodgkin\$ or leuk?emia or lymphoma or medulloblastoma or melanoma or mesothelioma or myeloma or neuroblastoma or nonmelanoma or osteosarcoma or retinoblastoma or sarcoma or seminoma or teratoma).ti,ab.                                           |
| 55. | 52 or 53 or 54                                                                                                                                                                                                                                                                                  |
| 56. | (pathway adj5 diagnos\$).ti,ab.                                                                                                                                                                                                                                                                 |
| 57. | (pathway adj5 detect\$).ti,ab.                                                                                                                                                                                                                                                                  |
| 58. | (route adj5 diagnos\$).ti,ab.                                                                                                                                                                                                                                                                   |
| 59. | (route adj5 detect\$).ti,ab.                                                                                                                                                                                                                                                                    |
| 60. | diagnos\$.ti,ab.                                                                                                                                                                                                                                                                                |
| 61. | detect\$.ti,ab.                                                                                                                                                                                                                                                                                 |
| 62. | consult\$.ti,ab.                                                                                                                                                                                                                                                                                |
| 63. | (help adj5 seek\$).ti,ab.                                                                                                                                                                                                                                                                       |
| 64. | present\$.ti,ab.                                                                                                                                                                                                                                                                                |
| 65. | (route adj5 consult\$).ti,ab.                                                                                                                                                                                                                                                                   |
| 66. | (route adj5 present\$).ti,ab.                                                                                                                                                                                                                                                                   |
| 67. | (pathway adj5 consult\$).ti,ab.                                                                                                                                                                                                                                                                 |
| 68. | (pathway adj5 present\$).ti,ab.                                                                                                                                                                                                                                                                 |
| 69. | 56 or 57 or 58 or 59 or 60 or 61 or 62 or 63 or 64 or 65 or 66 or 67 or 68                                                                                                                                                                                                                      |
| 70. | primary care.ti,ab.                                                                                                                                                                                                                                                                             |
| 71. | family doctor.ti,ab.                                                                                                                                                                                                                                                                            |
| 72. | physician.ti,ab.                                                                                                                                                                                                                                                                                |
| 73. | (health adj5 practitioner).ti,ab.                                                                                                                                                                                                                                                               |
| 74. | General Practitioners/ or Family Practice/ or Primary Health Care/                                                                                                                                                                                                                              |
| 75. | 70 or 71 or 72 or 73 or 74                                                                                                                                                                                                                                                                      |
| 76. | 51 and 55 and 69 and 75                                                                                                                                                                                                                                                                         |
